# Supplementary material for: Exploring the impact of efficacy messages on cessation-related outcomes using Ecological Momentary Assessment
Source: PubMed Central journal article supplement (PMC6659513; doi:10.18332/tid/94460), 2018-09-21
Supplement: TID-16-44-s1.pdf [file TID-16-44-s1.pdf]

Supplementary appendix: Efficacy inserts used in the EMA pilot study

**Self-efficacy inserts**

**After quitting, the cravings will fade away**

Quitting smoking can be like riding a roller coaster. Without warning, you can get a strong urge to smoke. Over time, these cravings will fade until they are gone. You've got what it takes to go smoke-free!




Self-efficacy message 1- Front

**After quitting, the cravings will fade away**

If you want help to quit, call **1-800-784-8669** or visit <http://smokefree.gov>

Self-efficacy message 1- Back

**Today could be the day**

People who set a quit date are more likely to quit.



| MM | DD | YY |
|----|----|----|
|    |    |    |

Try to pick a date that's not too far away. The sooner the better. Think of every quit attempt as a learning experience, not a failure.



Self-efficacy message 2- Front

**Today could be the day**

If you want help to quit, call **1-800-784-8669** or visit <http://smokefree.gov>

Self-efficacy message 2- Back

**Response efficacy inserts**

**Good things happen when you quit**

When you quit, in...

- 20 minutes**  
Your heart rate and blood pressure drop.
- 2 weeks - 3 months**  
Your blood circulation and lung function improve.
- 1 year**  
Your risk of heart disease is half of someone who continues to smoke. Your risk of a heart attack drops dramatically.
- 5 - 10 years**  
Your risk of lung cancer is cut in half.




Response efficacy message 1- Front

**Good things happen when you quit**

If you want help to quit, call **1-800-784-8669** or visit <http://smokefree.gov>

Response efficacy message 1- Back

**Quitting saves money**

If you smoke a pack a day, quitting will save you at least \$1,500 each year. Quitting leaves more money for paying bills, buying things you want, and doing the things you enjoy.




Response efficacy message 2- Front

**Quitting saves money**

If you want help to quit, call **1-800-784-8669** or visit <http://smokefree.gov>

Response efficacy message 2- Back
